CORRECTION

# Correction: When Is the Brain Dead? Living-Like Electrophysiological Responses and Photon Emissions from Applications of Neurotransmitters in Fixed Post-Mortem Human Brains

The *PLOS ONE* Staff

## Notice of Republication

This article was republished on December 15, 2016, to correct an error in the author order that was introduced during the typesetting process. The publisher apologizes for the error. Please download this article again to view the correct version. The originally published, uncorrected article and the republished, corrected article are provided here for reference.

## Supporting Information

**S1 File. Originally published, uncorrected article.**  
(PDF)

**S2 File. Republished, corrected article.**  
(PDF)

## Reference

1. Rouleau N, Murugan NJ, Tessaro LWE, Costa JN, Persinger MA (2016) When Is the Brain Dead? Living-Like Electrophysiological Responses and Photon Emissions from Applications of Neurotransmitters in Fixed Post-Mortem Human Brains. *PLoS ONE* 11(12): e0167231. doi: [10.1371/journal.pone.0167231](https://doi.org/10.1371/journal.pone.0167231) PMID: [27907050](https://pubmed.ncbi.nlm.nih.gov/27907050/)

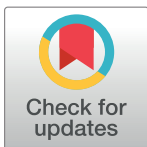

## OPEN ACCESS

**Citation:** The *PLOS ONE* Staff (2016) Correction: When Is the Brain Dead? Living-Like Electrophysiological Responses and Photon Emissions from Applications of Neurotransmitters in Fixed Post-Mortem Human Brains. *PLoS ONE* 11(12): e0169378. doi:[10.1371/journal.pone.0169378](https://doi.org/10.1371/journal.pone.0169378)

**Published:** December 28, 2016

**Copyright:** © 2016 The PLOS ONE Staff. This is an open access article distributed under the terms of the [Creative Commons Attribution License](https://creativecommons.org/licenses/by/4.0/), which permits unrestricted use, distribution, and reproduction in any medium, provided the original author and source are credited.
